# Supplementary material for: Global fire emissions and the contribution of deforestation, savanna, forest, agricultural, and peat fires (1997–2009)
Source: Copernicus journal article supplement (doi:10.5194/acp-10-11707-2010), 2010-12-10
Supplement: Supplementary file [file acp-10-11707-2010-supplement.pdf]

**Supplementary materials to “Global fire emissions and the contribution of deforestation, savanna, forest, agricultural, and peat fires (1997-2009)”**

Guido R. van der Werf, James T. Randerson, Louis Giglio, G. James Collatz, Mingquan Mu, Prasad S. Kasibhatla, Douglas C. Morton, Ruth S. DeFries, Yufang Jin, and Thijs T. van Leeuwen

Correspondence to: G. R. van der Werf ([guido.van.der.werf@falw.vu.nl](mailto:guido.van.der.werf@falw.vu.nl))

Table S1a. Tropical deforestation and forest degradation fire emissions (Tg C year<sup>-1</sup>) for 1997-2009.

| Region | Year |      |      |      |      |      |      |      |      |      |      |      |      | Mean |
|--------|------|------|------|------|------|------|------|------|------|------|------|------|------|------|
|        | 1997 | 1998 | 1999 | 2000 | 2001 | 2002 | 2003 | 2004 | 2005 | 2006 | 2007 | 2008 | 2009 |      |
| BONA   | 0    | 0    | 0    | 0    | 0    | 0    | 0    | 0    | 0    | 0    | 0    | 0    | 0    | 0    |
| TENA   | 0    | 0    | 0    | 0    | 0    | 0    | 0    | 0    | 0    | 1    | 0    | 0    | 0    | 0    |
| CEAM   | 8    | 37   | 5    | 15   | 2    | 6    | 16   | 2    | 11   | 11   | 7    | 7    | 10   | 11   |
| NHSA   | 8    | 33   | 2    | 4    | 4    | 2    | 31   | 7    | 2    | 2    | 10   | 3    | 3    | 9    |
| SHSA   | 93   | 162  | 102  | 53   | 46   | 99   | 118  | 200  | 315  | 161  | 349  | 109  | 49   | 143  |
| EURO   | 0    | 0    | 0    | 0    | 0    | 0    | 0    | 0    | 0    | 0    | 0    | 0    | 0    | 0    |
| MIDE   | 0    | 0    | 0    | 0    | 0    | 0    | 0    | 0    | 0    | 0    | 0    | 0    | 0    | 0    |
| NHAF   | 56   | 53   | 48   | 53   | 34   | 47   | 48   | 32   | 50   | 47   | 38   | 40   | 31   | 44   |
| SHAF   | 26   | 35   | 27   | 28   | 26   | 24   | 41   | 31   | 41   | 29   | 32   | 39   | 37   | 32   |
| BOAS   | 0    | 0    | 0    | 0    | 0    | 0    | 0    | 0    | 0    | 0    | 0    | 0    | 0    | 0    |
| CEAS   | 2    | 1    | 3    | 2    | 0    | 1    | 2    | 3    | 3    | 2    | 3    | 5    | 5    | 3    |
| SEAS   | 42   | 134  | 108  | 35   | 19   | 52   | 39   | 112  | 56   | 56   | 119  | 36   | 80   | 68   |
| EQAS   | 290  | 95   | 17   | 15   | 26   | 110  | 34   | 51   | 69   | 143  | 12   | 18   | 40   | 71   |
| AUST   | 4    | 1    | 2    | 2    | 4    | 4    | 3    | 2    | 6    | 2    | 1    | 2    | 6    | 3    |
| Globe  | 530  | 550  | 316  | 207  | 161  | 346  | 332  | 441  | 552  | 454  | 574  | 258  | 260  | 383  |

Table S1b. Grassland and savanna fire emissions (Tg C year<sup>-1</sup>) for 1997-2009.

| Region | Year |      |      |      |      |      |      |      |      |      |      |      |      | Mean |
|--------|------|------|------|------|------|------|------|------|------|------|------|------|------|------|
|        | 1997 | 1998 | 1999 | 2000 | 2001 | 2002 | 2003 | 2004 | 2005 | 2006 | 2007 | 2008 | 2009 |      |
| BONA   | 3    | 18   | 4    | 3    | 0    | 2    | 2    | 2    | 2    | 1    | 1    | 1    | 1    | 3    |
| TENA   | 1    | 1    | 2    | 2    | 1    | 1    | 1    | 0    | 2    | 2    | 2    | 1    | 2    | 1    |
| CEAM   | 2    | 4    | 2    | 3    | 2    | 2    | 2    | 1    | 2    | 2    | 2    | 2    | 2    | 2    |
| NHSA   | 8    | 14   | 11   | 13   | 11   | 6    | 17   | 17   | 9    | 8    | 13   | 9    | 9    | 11   |
| SHSA   | 69   | 179  | 122  | 60   | 67   | 75   | 58   | 61   | 76   | 36   | 104  | 40   | 21   | 74   |
| EURO   | 1    | 1    | 1    | 1    | 0    | 0    | 1    | 0    | 0    | 0    | 1    | 0    | 0    | 0    |
| MIDE   | 0    | 1    | 1    | 1    | 0    | 0    | 1    | 1    | 0    | 1    | 1    | 0    | 1    | 1    |
| NHAF   | 337  | 384  | 343  | 341  | 293  | 338  | 334  | 299  | 370  | 294  | 310  | 315  | 271  | 325  |
| SHAF   | 217  | 327  | 253  | 255  | 266  | 269  | 316  | 315  | 315  | 295  | 291  | 303  | 294  | 286  |
| BOAS   | 8    | 74   | 9    | 15   | 9    | 7    | 27   | 1    | 4    | 6    | 5    | 8    | 6    | 14   |
| CEAS   | 21   | 13   | 5    | 13   | 8    | 23   | 13   | 11   | 12   | 14   | 14   | 9    | 7    | 12   |
| SEAS   | 7    | 12   | 17   | 8    | 7    | 16   | 12   | 22   | 10   | 11   | 18   | 12   | 10   | 13   |
| EQAS   | 10   | 2    | 1    | 1    | 2    | 3    | 1    | 2    | 1    | 2    | 1    | 0    | 1    | 2    |
| AUST   | 94   | 97   | 164  | 129  | 161  | 123  | 80   | 140  | 73   | 112  | 107  | 70   | 104  | 112  |
| All    | 779  | 1127 | 934  | 844  | 829  | 866  | 864  | 873  | 876  | 784  | 868  | 770  | 728  | 857  |

Table S1c. Woodland fire emissions (Tg C year<sup>-1</sup>) for 1997-2009.

| Region | Year |      |      |      |      |      |      |      |      |      |      |      |      | Mean |
|--------|------|------|------|------|------|------|------|------|------|------|------|------|------|------|
|        | 1997 | 1998 | 1999 | 2000 | 2001 | 2002 | 2003 | 2004 | 2005 | 2006 | 2007 | 2008 | 2009 |      |
| BONA   | 1    | 4    | 2    | 0    | 0    | 1    | 1    | 2    | 1    | 1    | 1    | 1    | 1    | 1    |
| TENA   | 0    | 3    | 2    | 4    | 2    | 1    | 2    | 2    | 2    | 2    | 5    | 2    | 2    | 2    |
| CEAM   | 1    | 5    | 2    | 2    | 2    | 2    | 3    | 2    | 6    | 3    | 1    | 2    | 2    | 2    |
| NHSA   | 1    | 1    | 0    | 0    | 0    | 0    | 1    | 0    | 0    | 0    | 0    | 0    | 0    | 0    |
| SHSA   | 12   | 20   | 26   | 6    | 14   | 32   | 15   | 29   | 32   | 23   | 70   | 23   | 9    | 24   |
| EURO   | 1    | 3    | 1    | 3    | 1    | 1    | 2    | 1    | 3    | 1    | 3    | 1    | 1    | 2    |
| MIDE   | 0    | 0    | 0    | 0    | 0    | 0    | 0    | 0    | 0    | 0    | 1    | 0    | 0    | 0    |
| NHAF   | 143  | 112  | 86   | 104  | 73   | 63   | 97   | 48   | 81   | 73   | 66   | 64   | 36   | 80   |
| SHAF   | 209  | 247  | 193  | 174  | 173  | 142  | 185  | 175  | 204  | 166  | 160  | 181  | 159  | 182  |
| BOAS   | 4    | 12   | 6    | 5    | 4    | 10   | 22   | 2    | 3    | 5    | 6    | 17   | 4    | 8    |
| CEAS   | 5    | 3    | 2    | 3    | 5    | 5    | 4    | 3    | 3    | 4    | 4    | 7    | 4    | 4    |
| SEAS   | 5    | 7    | 7    | 3    | 4    | 5    | 5    | 6    | 3    | 4    | 5    | 3    | 2    | 5    |
| EQAS   | 0    | 0    | 0    | 0    | 0    | 0    | 0    | 0    | 0    | 0    | 0    | 0    | 0    | 0    |
| AUST   | 9    | 6    | 10   | 7    | 9    | 6    | 8    | 7    | 6    | 9    | 3    | 3    | 13   | 7    |
| Globe  | 392  | 423  | 339  | 312  | 288  | 269  | 344  | 278  | 342  | 291  | 326  | 304  | 233  | 319  |

Table S1d. Forest fire emissions (Tg C year<sup>-1</sup>) for 1997-2009.

| Region | Year |      |      |      |      |      |      |      |      |      |      |      |      | Mean |
|--------|------|------|------|------|------|------|------|------|------|------|------|------|------|------|
|        | 1997 | 1998 | 1999 | 2000 | 2001 | 2002 | 2003 | 2004 | 2005 | 2006 | 2007 | 2008 | 2009 |      |
| BONA   | 15   | 94   | 30   | 11   | 4    | 65   | 57   | 135  | 63   | 47   | 39   | 47   | 42   | 50   |
| TENA   | 0    | 3    | 5    | 5    | 2    | 7    | 5    | 1    | 2    | 5    | 12   | 8    | 3    | 5    |
| CEAM   | 2    | 10   | 4    | 5    | 2    | 2    | 4    | 1    | 6    | 3    | 2    | 2    | 2    | 3    |
| NHSA   | 2    | 3    | 1    | 1    | 1    | 1    | 5    | 1    | 1    | 1    | 2    | 1    | 1    | 2    |
| SHSA   | 19   | 35   | 34   | 12   | 8    | 19   | 18   | 32   | 31   | 16   | 39   | 17   | 8    | 22   |
| EURO   | 1    | 2    | 0    | 2    | 1    | 0    | 2    | 0    | 2    | 2    | 1    | 0    | 0    | 1    |
| MIDE   | 0    | 0    | 0    | 0    | 0    | 0    | 0    | 0    | 0    | 0    | 0    | 0    | 0    | 0    |
| NHAF   | 35   | 30   | 25   | 26   | 18   | 22   | 20   | 19   | 23   | 20   | 19   | 18   | 17   | 22   |
| SHAF   | 56   | 64   | 55   | 50   | 46   | 43   | 49   | 54   | 57   | 54   | 45   | 51   | 51   | 52   |
| BOAS   | 24   | 243  | 64   | 116  | 86   | 167  | 269  | 11   | 38   | 80   | 29   | 126  | 51   | 100  |
| CEAS   | 18   | 6    | 3    | 10   | 2    | 7    | 17   | 1    | 2    | 6    | 4    | 5    | 6    | 7    |
| SEAS   | 7    | 20   | 21   | 5    | 3    | 7    | 6    | 13   | 7    | 5    | 12   | 5    | 6    | 9    |
| EQAS   | 45   | 11   | 2    | 1    | 2    | 9    | 2    | 5    | 3    | 9    | 1    | 1    | 4    | 7    |
| AUST   | 11   | 8    | 6    | 8    | 12   | 20   | 36   | 5    | 4    | 24   | 10   | 3    | 14   | 12   |
| Globe  | 234  | 529  | 250  | 253  | 187  | 370  | 490  | 279  | 238  | 274  | 215  | 285  | 205  | 293  |

Table 1e. Agricultural waste burning emissions (Tg C year<sup>-1</sup>) for 1997-2009.

| Region | Year |      |      |      |      |      |      |      |      |      |      |      |      | Mean |
|--------|------|------|------|------|------|------|------|------|------|------|------|------|------|------|
|        | 1997 | 1998 | 1999 | 2000 | 2001 | 2002 | 2003 | 2004 | 2005 | 2006 | 2007 | 2008 | 2009 |      |
| BONA   | 0    | 0    | 0    | 0    | 0    | 0    | 0    | 0    | 0    | 0    | 0    | 0    | 0    | 0    |
| TENA   | 0    | 1    | 1    | 1    | 1    | 1    | 1    | 1    | 1    | 1    | 1    | 1    | 1    | 1    |
| CEAM   | 1    | 5    | 1    | 2    | 1    | 1    | 3    | 2    | 2    | 2    | 2    | 1    | 2    | 2    |
| NHSA   | 1    | 0    | 0    | 0    | 0    | 0    | 0    | 0    | 0    | 0    | 0    | 0    | 0    | 0    |
| SHSA   | 8    | 17   | 14   | 6    | 7    | 6    | 5    | 5    | 5    | 5    | 9    | 5    | 3    | 7    |
| EURO   | 0    | 1    | 1    | 2    | 3    | 1    | 1    | 1    | 0    | 1    | 2    | 1    | 1    | 1    |
| MIDE   | 1    | 1    | 1    | 0    | 2    | 1    | 1    | 1    | 1    | 1    | 1    | 0    | 1    | 1    |
| NHAF   | 10   | 8    | 9    | 9    | 9    | 8    | 8    | 8    | 9    | 8    | 7    | 7    | 7    | 8    |
| SHAF   | 5    | 8    | 5    | 5    | 4    | 4    | 5    | 5    | 5    | 4    | 5    | 4    | 4    | 5    |
| BOAS   | 6    | 9    | 5    | 5    | 5    | 6    | 16   | 2    | 3    | 5    | 6    | 14   | 5    | 7    |
| CEAS   | 11   | 7    | 5    | 9    | 18   | 13   | 7    | 7    | 8    | 9    | 10   | 15   | 9    | 10   |
| SEAS   | 4    | 13   | 7    | 4    | 7    | 11   | 7    | 13   | 11   | 6    | 11   | 8    | 8    | 8    |
| EQAS   | 25   | 5    | 1    | 1    | 1    | 4    | 1    | 1    | 1    | 4    | 1    | 0    | 2    | 4    |
| AUST   | 0    | 0    | 1    | 0    | 0    | 0    | 0    | 0    | 0    | 0    | 0    | 0    | 0    | 0    |
| Globe  | 72   | 75   | 51   | 46   | 57   | 56   | 55   | 46   | 47   | 46   | 55   | 59   | 44   | 55   |

Table 1f. Tropical peatland fire emissions (Tg C year<sup>-1</sup>) for 1997-2009.

| Region | Year |      |      |      |      |      |      |      |      |      |      |      |      | Mean |
|--------|------|------|------|------|------|------|------|------|------|------|------|------|------|------|
|        | 1997 | 1998 | 1999 | 2000 | 2001 | 2002 | 2003 | 2004 | 2005 | 2006 | 2007 | 2008 | 2009 |      |
| EQAS   | 699  | 71   | 11   | 2    | 39   | 159  | 33   | 50   | 49   | 209  | 6    | 5    | 53   | 107  |
| Globe  | 699  | 71   | 11   | 2    | 39   | 159  | 33   | 50   | 49   | 209  | 6    | 5    | 53   | 107  |

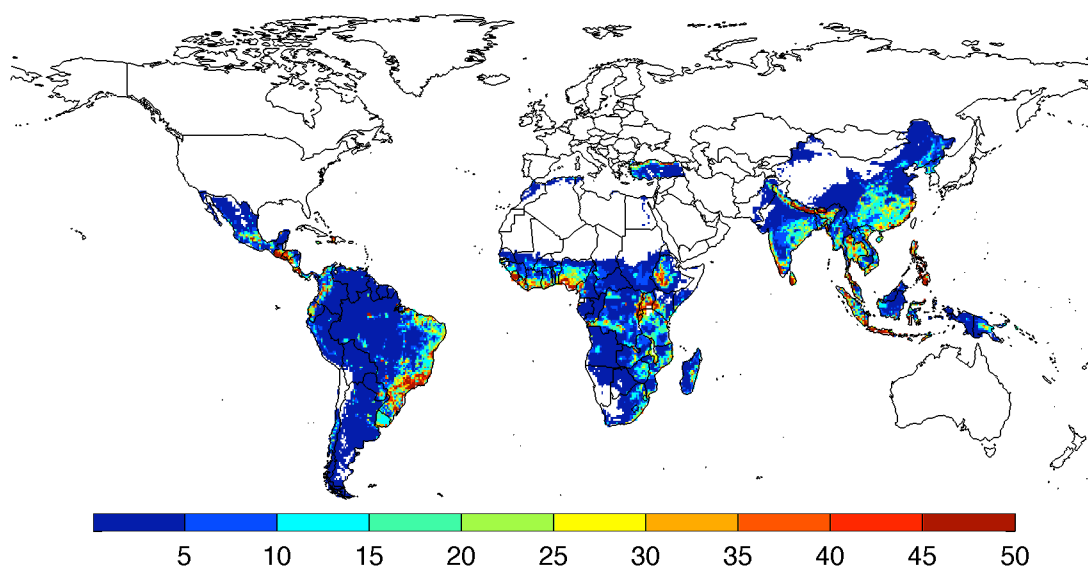

Fig. S1. Fuel wood collection ( $\text{g C m}^{-2} \text{ year}^{-1}$ ) based on population density and country-level fuel wood collection statistics (as in van der Werf et al., 2003).

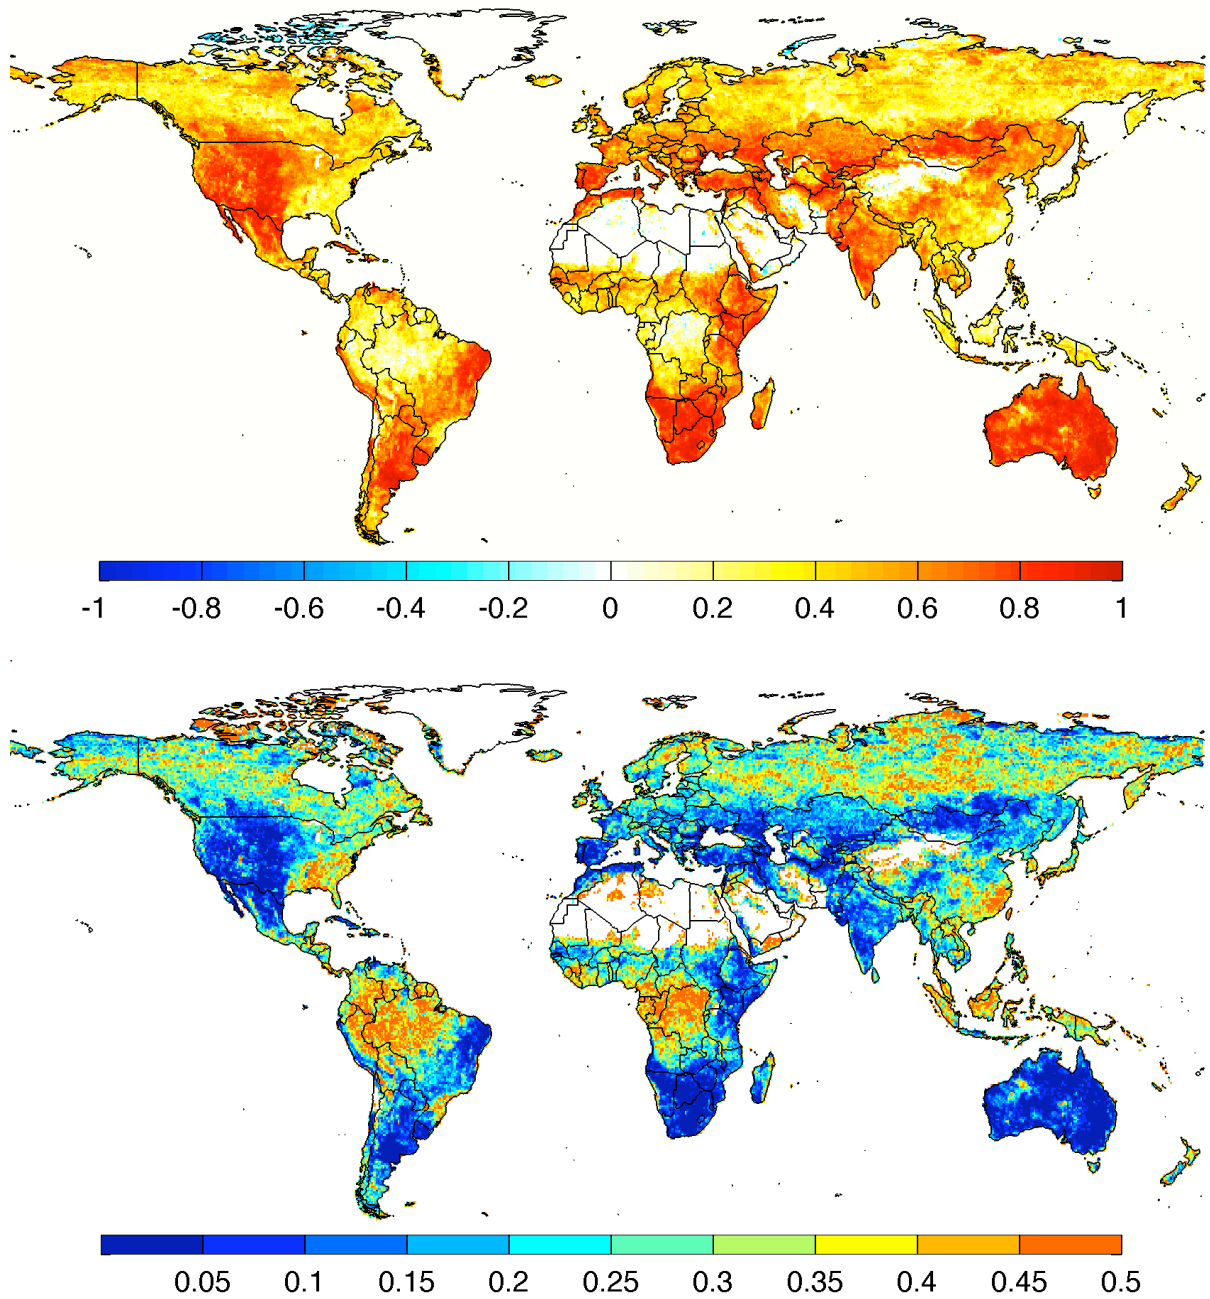

Fig. S2. Regression coefficient (top panel) and  $p$ -value (bottom panel) of linear regression between MODIS  $fAPAR$  and AVHRR GIMMS NDVI anomalies over 2001-2008 ( $n = 8$ ). Values were the mean of the 12 monthly regressions.

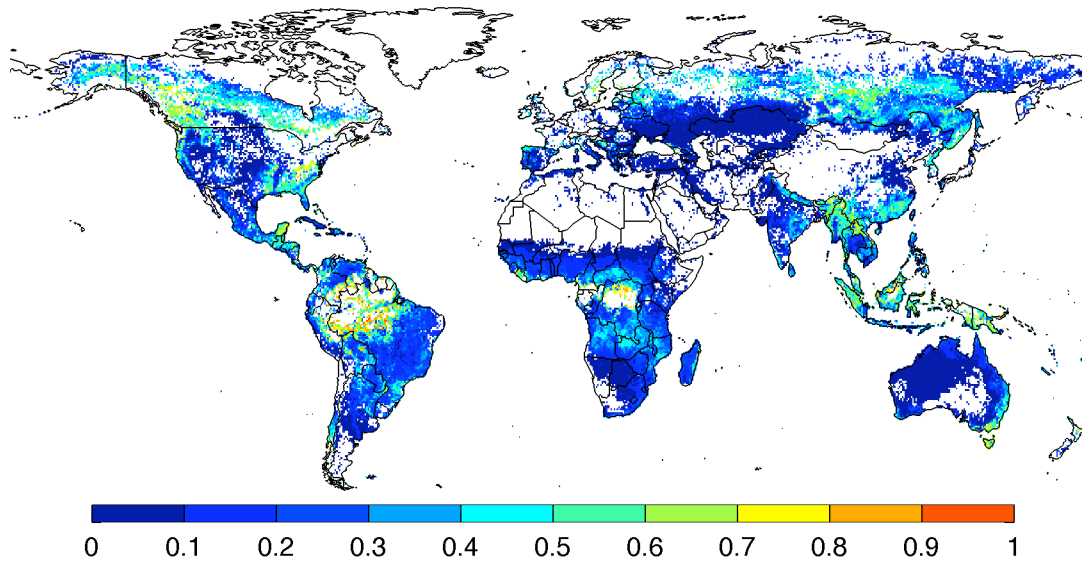

Fig. S3. Contribution of area burned in the wooded fraction to total burned area in each  $0.5^\circ$  grid cell during 2001-2009. This calculation was based on the 500 meter burned area, 500 meter fractional tree cover maps, and eq. 3.

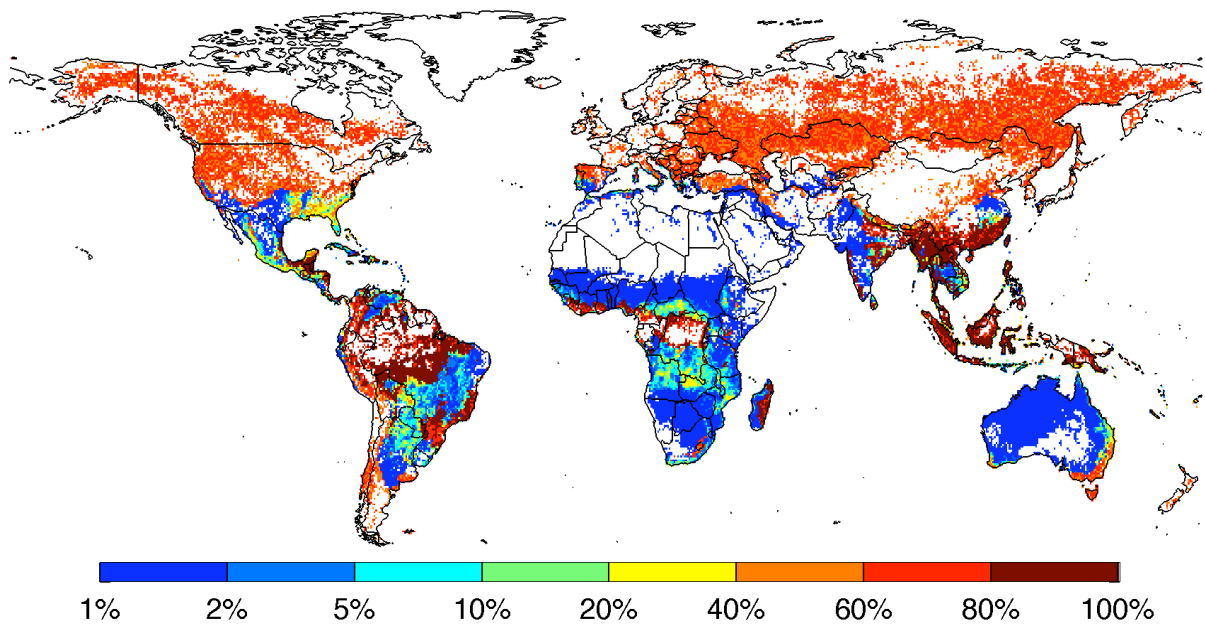

Fig. S4. Fire induced tree mortality as a function of burned area and fractional tree cover (eq. 4). Tree mortality was constant (60%) in temperate and boreal ecosystems (Mean annual temperature  $< 15^\circ\text{C}$ ) and varied between 80-100% in deforestation zones based on fire persistence.

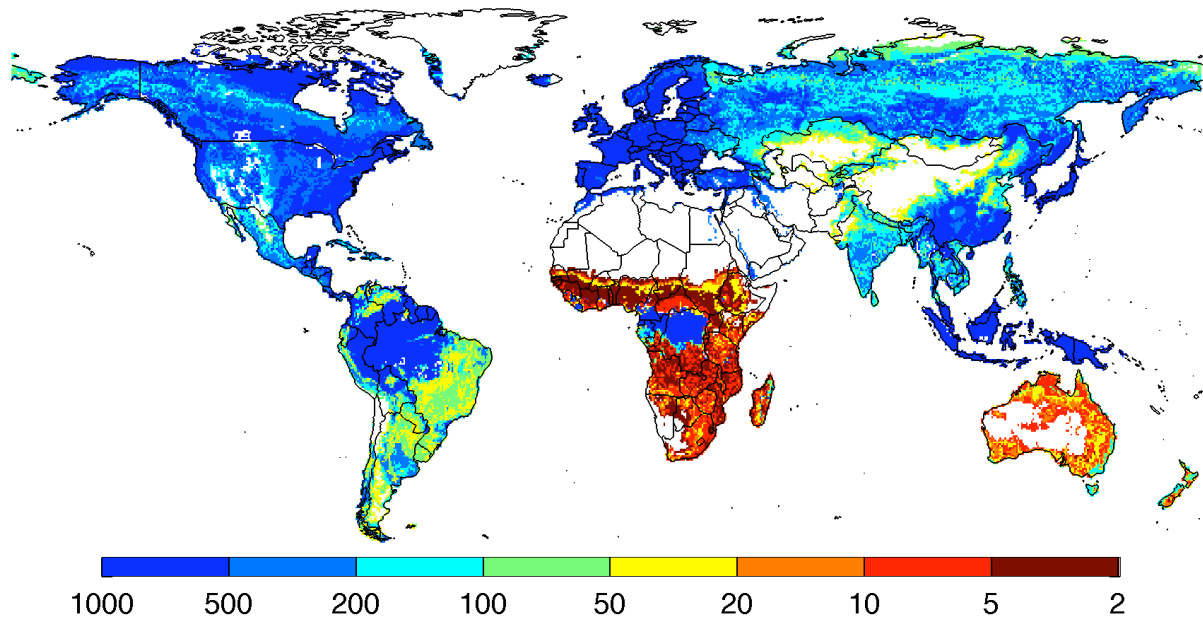

Fig. S5. Average fire return time (years) used in the spin-up, based on burned area during 1997-2009, averaged per region by 10% fractional tree cover bins. Note that the high fire return times observed in African savanna areas do not necessarily limit tree growth; modeled tree mortality is relatively low in these regions (Fig. S4).



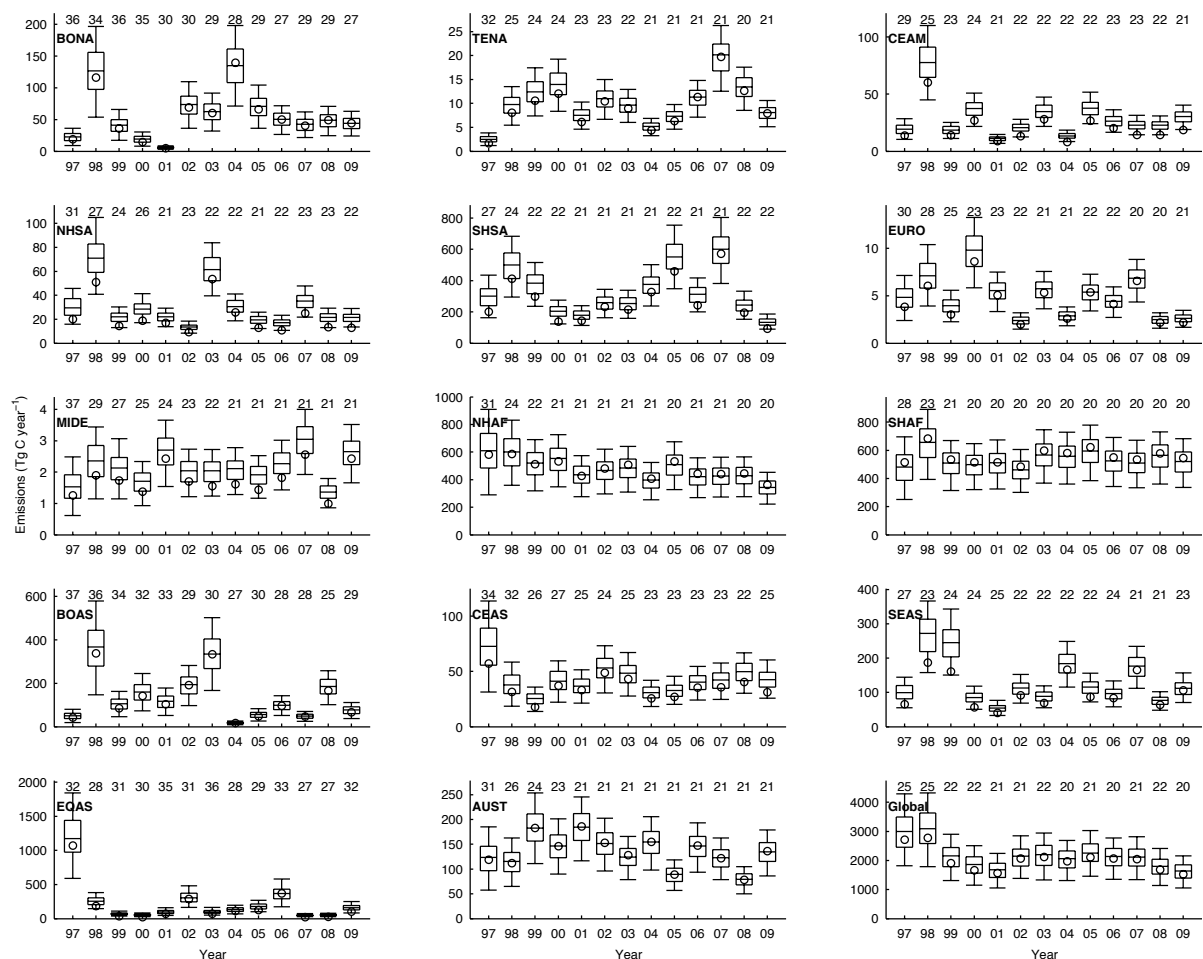

Fig. S6. Annual uncertainties for different regions (Fig. 7) expressed as the 5<sup>th</sup>, 25<sup>th</sup>, 50<sup>th</sup>, 75<sup>th</sup>, and 95<sup>th</sup> percentiles of 2000 runs in a Monte Carlo set-up. Circles denote the estimates reported throughout the paper, which do not necessarily align with the 50<sup>th</sup> percentiles due to truncation of several parameters in the Monte Carlo simulations. Numbers on top give an indication of 1 $\sigma$  uncertainties (expressed as percentage of the 50<sup>th</sup> percentile) assuming a Gaussian distribution.

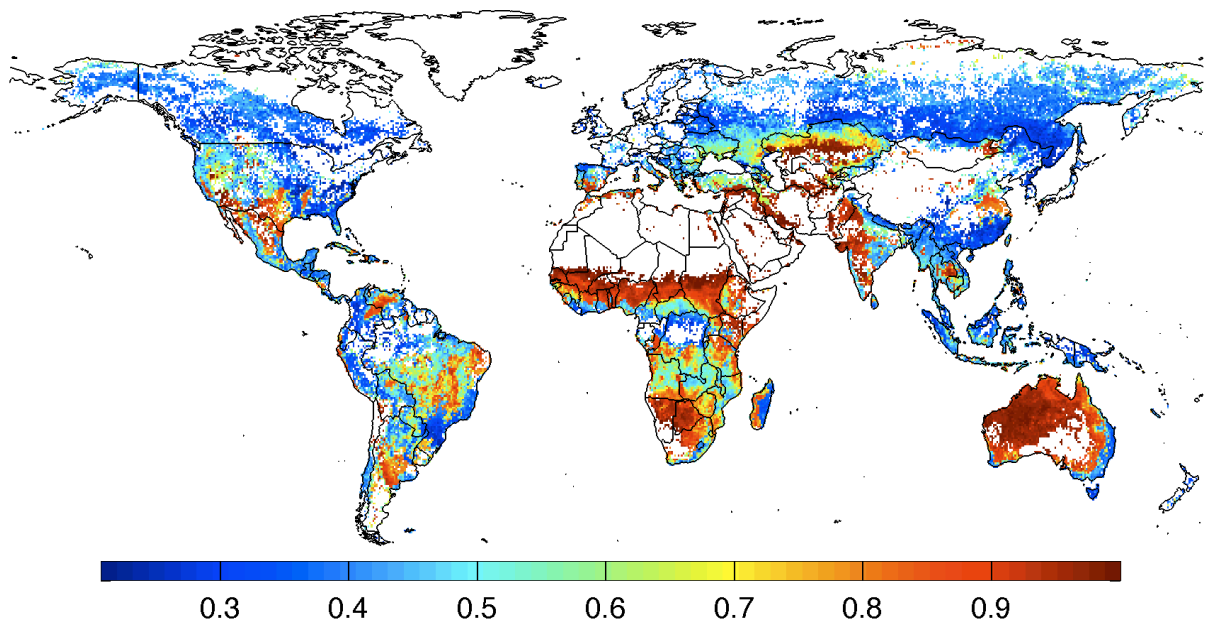

Fig. S7. Combustion completeness of aboveground live biomass (trees, leaves, grass), averaged over 1997-2009. Only trees killed by fire are taken into account, combustion completeness decreases when taking all trees into account (see Table 4).

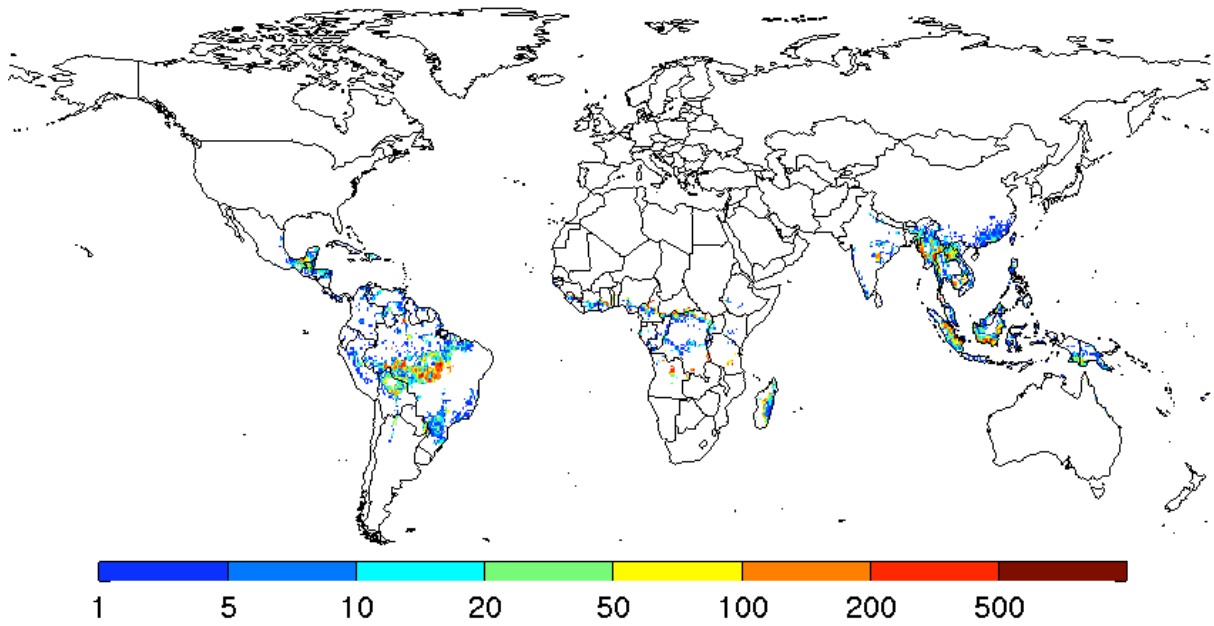

Fig. S8a. Annual emissions from deforestation and degradation fires ( $\text{g C m}^{-2} \text{ year}^{-1}$ ), averaged over 1997-2009.

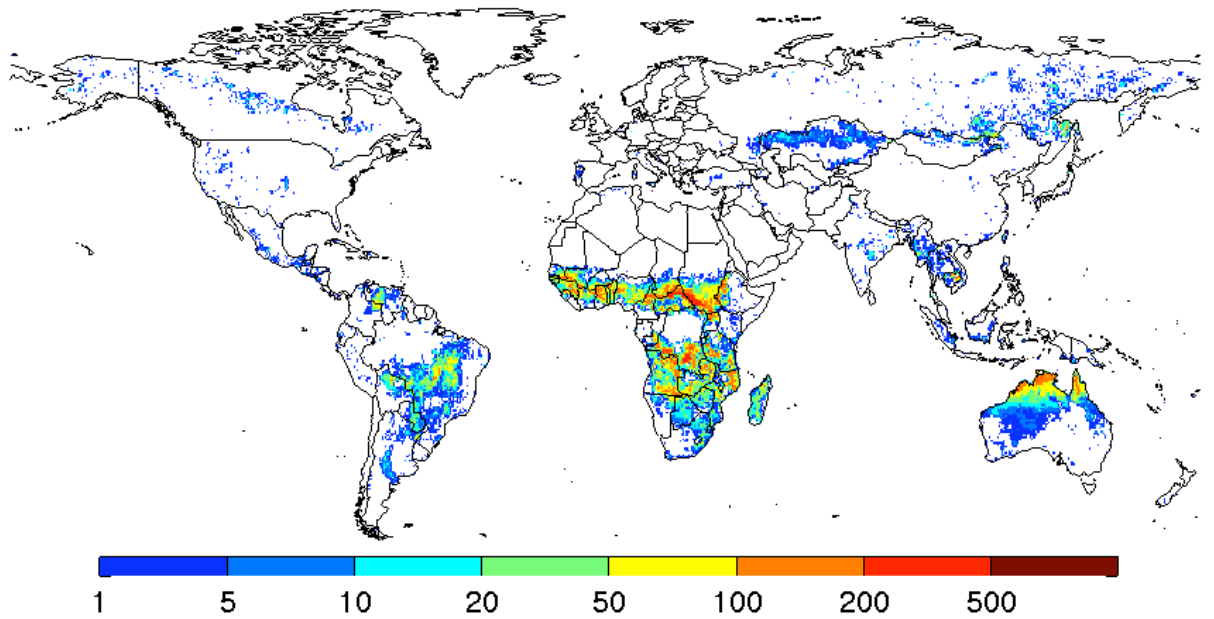

Fig. S8b. Annual emissions from savanna and grassland fires ( $\text{g C m}^{-2} \text{ year}^{-1}$ ), averaged over 1997-2009.

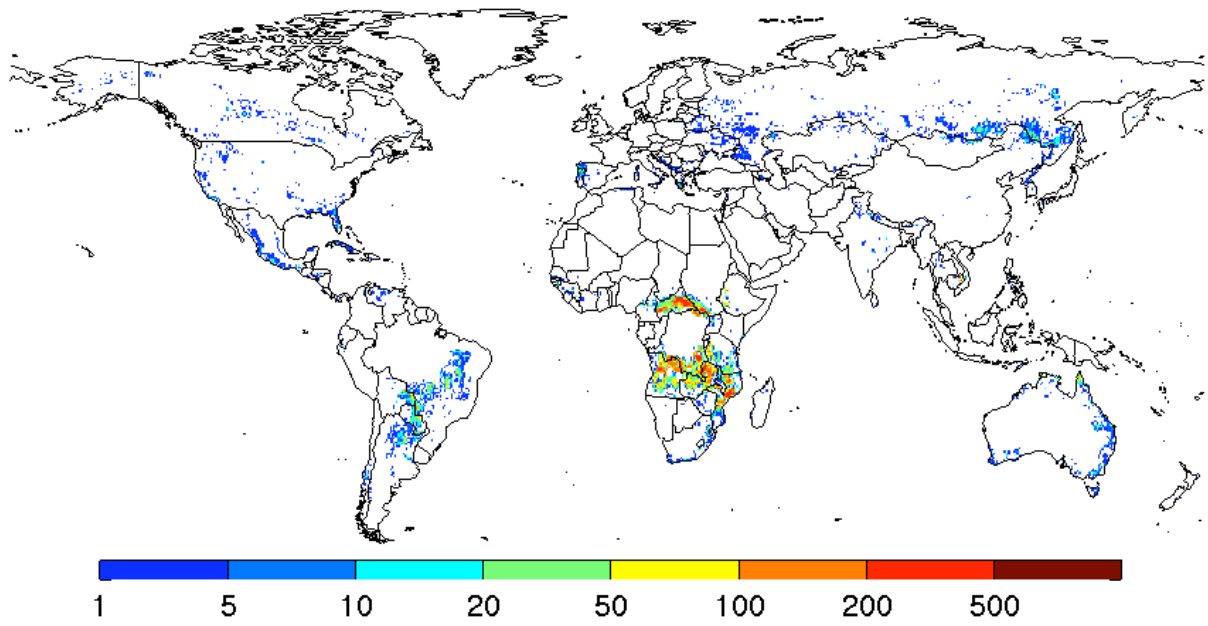

Fig. S8c. Annual emissions from woodland fires ( $\text{g C m}^{-2} \text{ year}^{-1}$ ), averaged over 1997-2009.

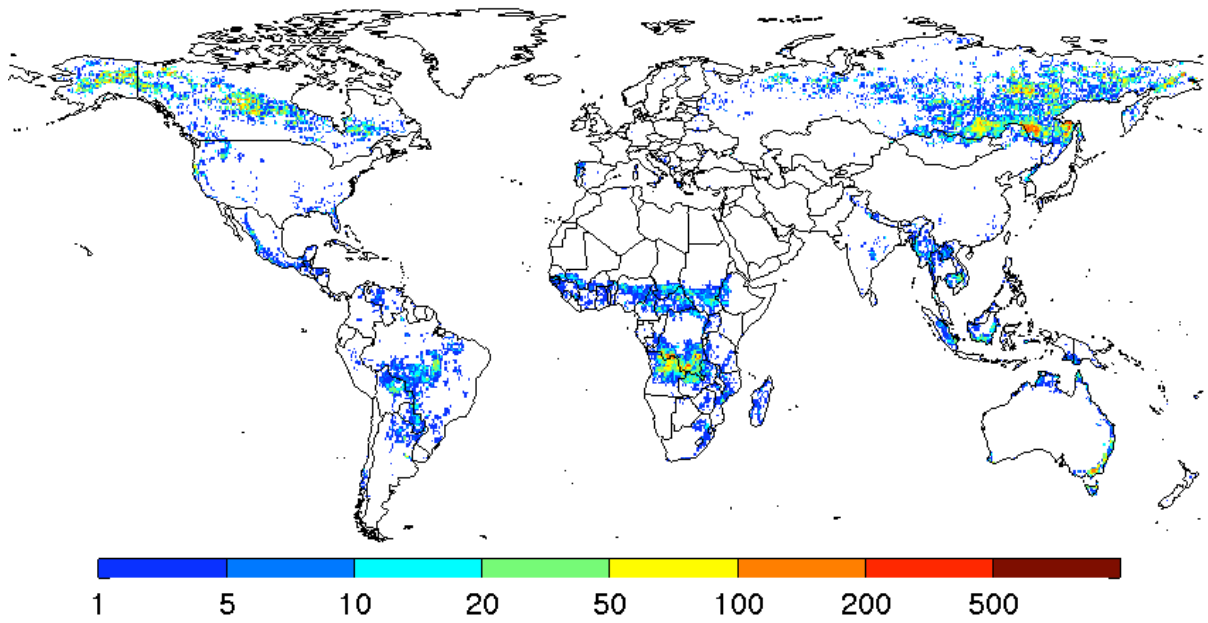

Fig. S8d. Annual emissions from forest fires ( $\text{g C m}^{-2} \text{ year}^{-1}$ ), averaged over 1997-2009.

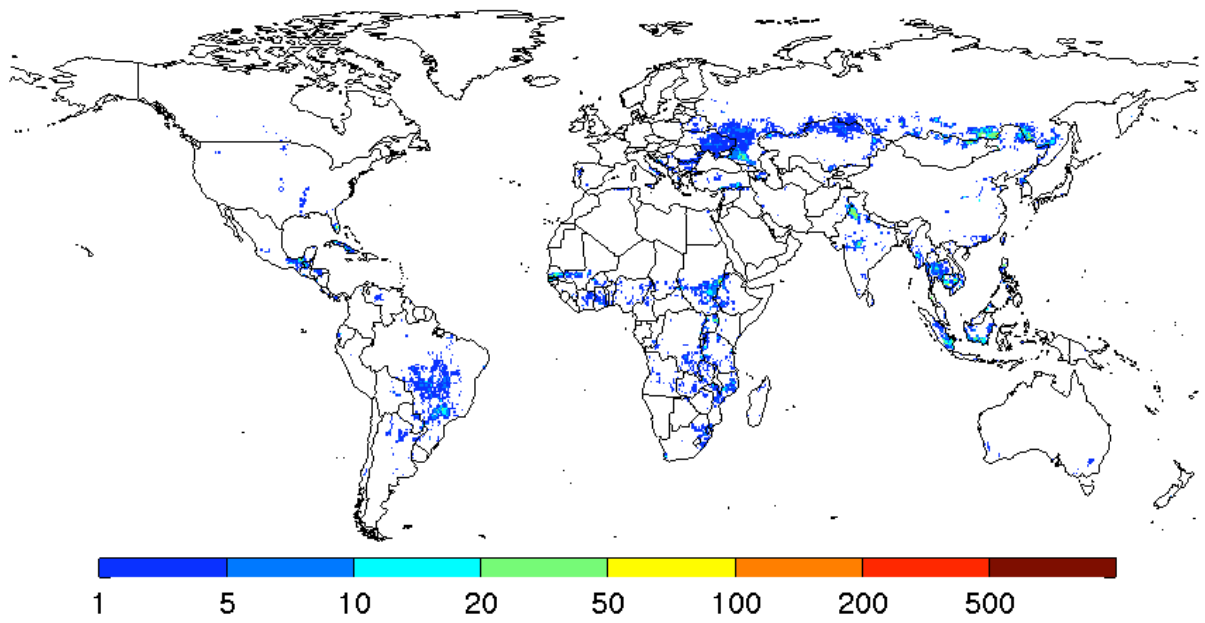

Fig. S8e. Annual emissions from agricultural waste burning ( $\text{g C m}^{-2} \text{ year}^{-1}$ ), averaged over 1997-2009.

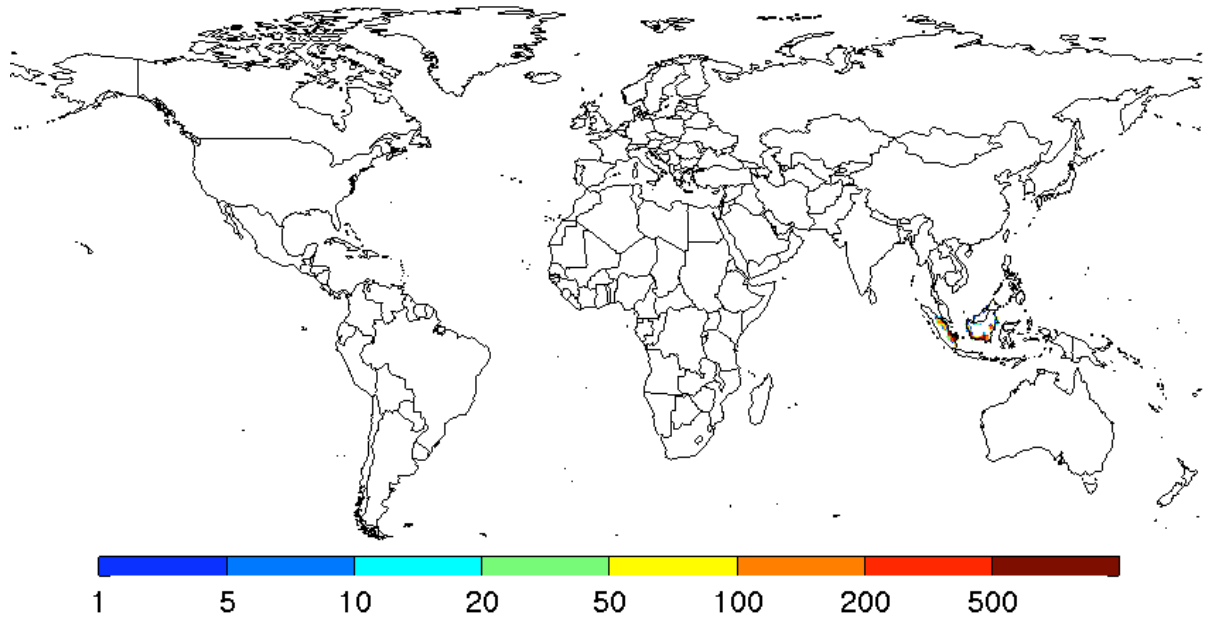

Fig. S8f. Annual emissions from tropical peatland fires ( $\text{g C m}^{-2} \text{ year}^{-1}$ ), averaged over 1997-2009.

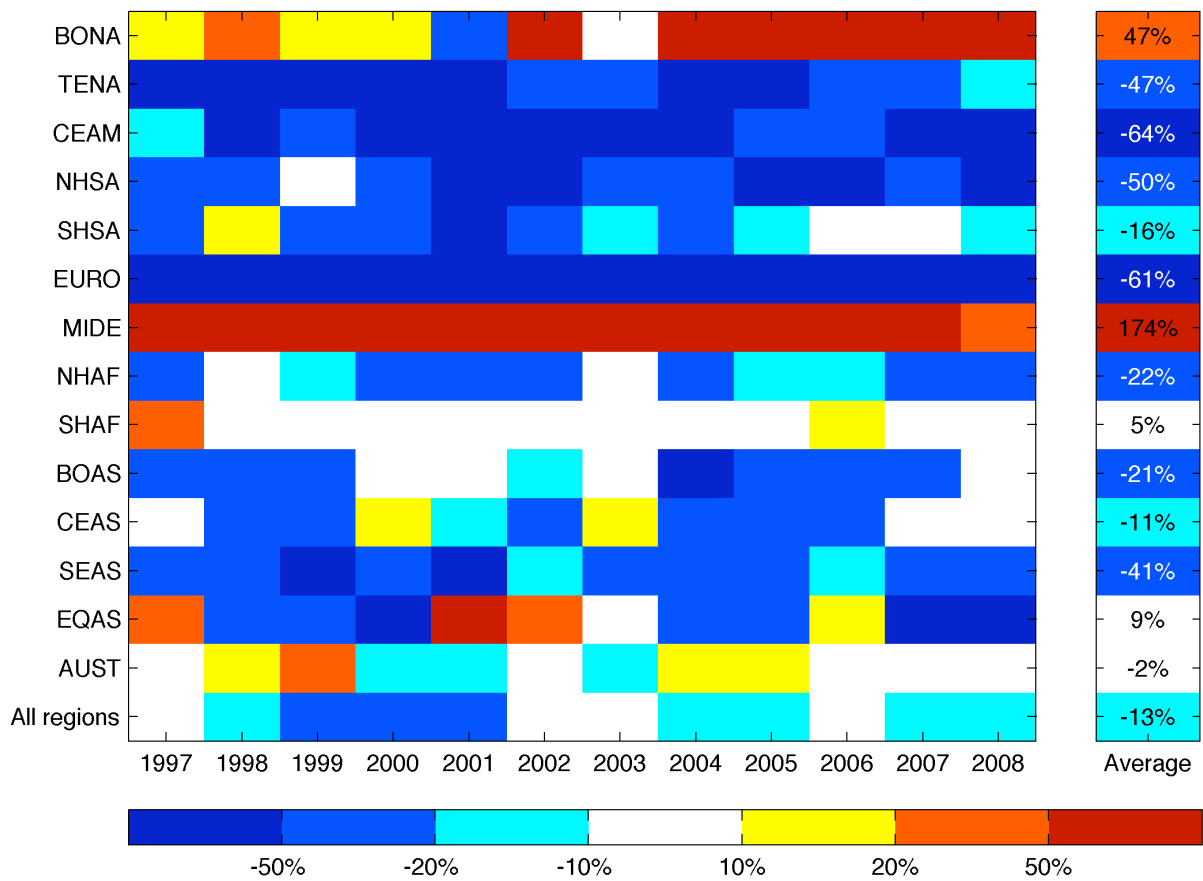

Fig. S9. Differences in fire CO emissions estimates between GFED3 and GFED2, as a percent of GFED2 estimates. Positive numbers indicate GFED3 is higher than GFED2 and vice versa.

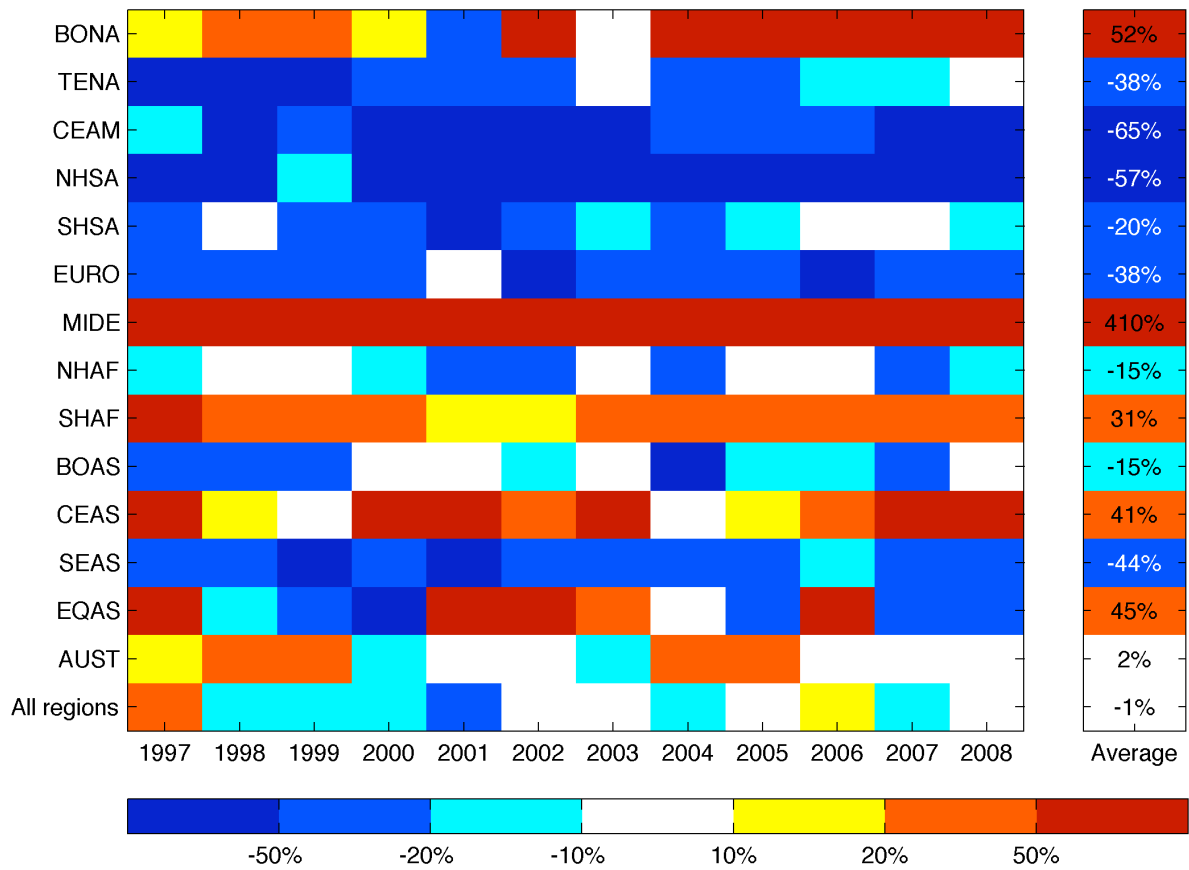

Fig. S10. Differences in fire CH<sub>4</sub> emissions estimates between GFED3 and GFED2, as a percent of GFED2 estimates. Positive numbers indicate GFED3 is higher than GFED2 and vice versa.
